# Supplementary material for: Multiplex real-time PCR assay combined with rolling circle amplification (MPRP) using universal primers for non-invasive detection of tumor-related mutations
Source: Royal Society of Chemistry journal article supplement (doi:10.1039/c8ra05259j), 2018-01-01
Supplement: c8ra05259j1.pdf [file c8ra05259j1.pdf]

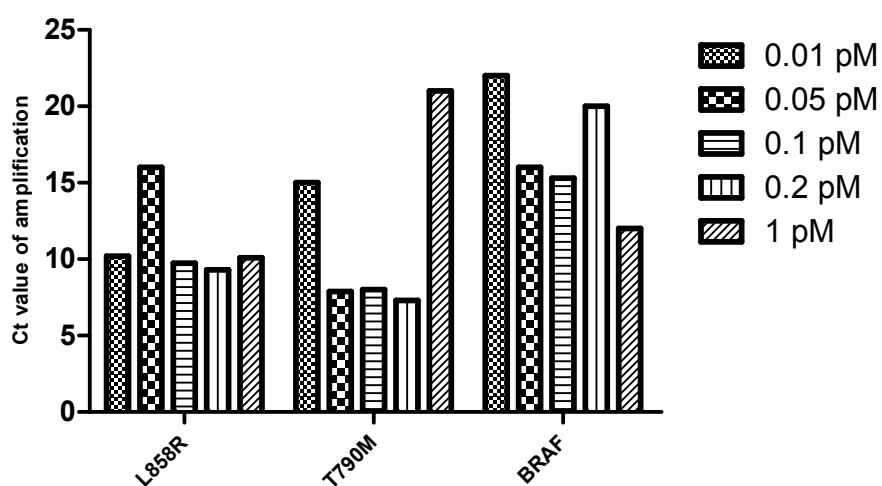

Fig. S1 Influence of the padlock probe concentration on the detection sensitivity. Padlock probe concentration: 0.01 pM – 1 pM.

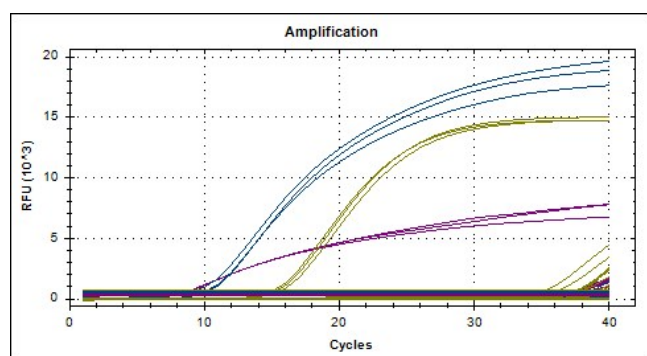

Fig. S2 The amplification curve of specificity of MPRP assay.

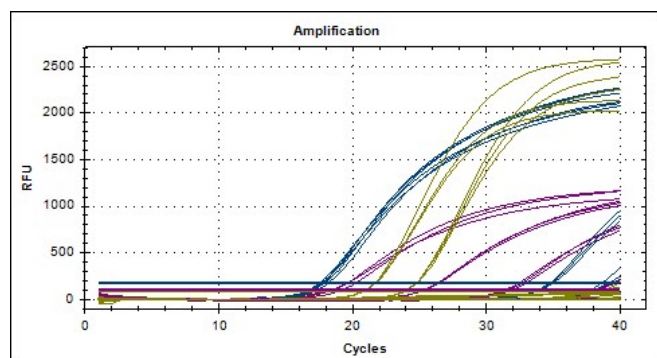

Fig. S3 The amplification curve of sensitivity of MPRP assay.

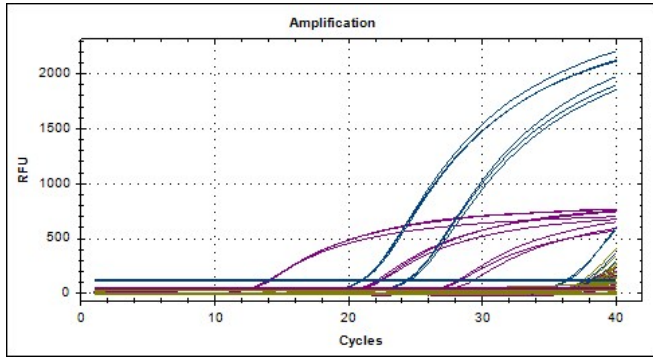

Fig. S4 The amplification curve of clinical test of MPRP assay.

Table S1. Detection of EGFR L858R, T790M and BRAF V600E mutations in 8 patients' samples using digital PCR.

| <b>Patients ID</b>                 |                                     | p1     | p2     | p5     | p3     | p6      | p8     | p7     | p9     |
|------------------------------------|-------------------------------------|--------|--------|--------|--------|---------|--------|--------|--------|
| <b>gender</b>                      |                                     | female | male   | female | female | male    | male   | female | female |
| <b>Clinical ID</b>                 |                                     | 497714 | 500633 | 505479 | 505479 | 2890137 | 253471 | 524012 | 497714 |
| <b>cfDNA concentration (ng/ul)</b> |                                     | 87.34  | 11.73  | 21.52  | 47.93  | 47.49   | 23.55  | 44.5   | 40.1   |
| <b>EGFR L858R</b>                  | <b>MU concentration (copies/ul)</b> | 0      | 0      | 0.57   | 0.65   | 0.32    | 0      | 0.07   | 0      |
|                                    | <b>Number of positive droplets</b>  | 0      | 0      | 9      | 8      | 4       | 0      | 1      | 0      |
|                                    | <b>WT concentration (copies/ul)</b> | 48.1   | 6.51   | 23.3   | 14.8   | 13.1    | 24.8   | 54.4   | 62.3   |
|                                    | <b>Number of positive droplets</b>  | 547    | 75     | 205    | 181    | 165     | 289    | 743    | 862    |
|                                    | <b>Mutation Ratio</b>               | 0      | 0      | 2.30%  | 4.21%  | 2.38%   | 0      | 0.13%  | 0      |
| <b>EGFR T790M</b>                  | <b>MU concentration (copies/ul)</b> | 0.08   | 1.39   | 0      | 1.07   | 0.63    | 0      | 0      | 0      |
|                                    | <b>Number of positive droplets</b>  | 1      | 14     | 4      | 14     | 7       | 0      | 0      | 0      |
|                                    | <b>WT concentration (copies/ul)</b> | 30.4   | 3.96   | 22     | 11.9   | 7.67    | 19.4   | 19.4   | 43     |
|                                    | <b>Number of positive droplets</b>  | 369    | 47     | 157    | 155    | 85      | 267    | 468    | 615    |
|                                    | <b>Mutation Ratio</b>               | 0.26%  | 25.98% | 0      | 8.25%  | 7.59%   | 0      | 0      | 0      |

|                       |                                         |      |      |      |      |      |       |      |      |
|-----------------------|-----------------------------------------|------|------|------|------|------|-------|------|------|
| <b>BRAF<br/>V600E</b> | <b>MU concentration<br/>(copies/ul)</b> | 0    | 0    | 0    | 0    | 0    | 0.07  | 0    | 0    |
|                       | <b>Number of positive<br/>droplets</b>  | 0    | 0    | 0    | 0    | 0    | 1     | 0    | 0    |
|                       | <b>WT concentration<br/>(copies/ul)</b> | 48.5 | 11.6 | 43.8 | 31.5 | 29.9 | 18.8  | 50.1 | 22.7 |
|                       | <b>Number of positive<br/>droplets</b>  | 657  | 66   | 469  | 393  | 396  | 253   | 333  | 284  |
|                       | <b>Mutation Ratio</b>                   | 0    | 0    | 0    | 0    | 0    | 0.37% | 0    | 0    |
